# Supplementary material for: Redefining the Genus Corollospora Based on Morphological and Phylogenetic Approaches
Source: MDPI journal article supplement (doi:10.3390/jof9080841), 2023-08-11
Supplement: s1 [file s1]

|    | 2                            | 3                          | 4    | 5    | 6    | 7    | 8    | 9    | 10   | 11   | 12   | 13   | 14   | 15   | 16   | 17   | 18   | 19   | 20   | 21   | 22   | 23   | 24   | 25   | 26   | 27   | 28   | 29   | 30   | 31   | 32   | 33   | 34   | 35   | 36   | 37   | 38   | 39   | 40 | 41 | 42 | 43 | 44 | 45 | 46 | 47 |  |  |  |  |
|----|------------------------------|----------------------------|------|------|------|------|------|------|------|------|------|------|------|------|------|------|------|------|------|------|------|------|------|------|------|------|------|------|------|------|------|------|------|------|------|------|------|------|----|----|----|----|----|----|----|----|--|--|--|--|
| 2  | Corollospora maritima        | FCUL CaC1                  |      |      |      |      |      |      |      |      |      |      |      |      |      |      |      |      |      |      |      |      |      |      |      |      |      |      |      |      |      |      |      |      |      |      |      |      |    |    |    |    |    |    |    |    |  |  |  |  |
| 3  | Corollospora maritima        | FCUL280207CF8              | 0.01 |      |      |      |      |      |      |      |      |      |      |      |      |      |      |      |      |      |      |      |      |      |      |      |      |      |      |      |      |      |      |      |      |      |      |      |    |    |    |    |    |    |    |    |  |  |  |  |
| 4  | Corollospora maritima        | CUB10 (KX261252)           | 0.01 | 0.01 |      |      |      |      |      |      |      |      |      |      |      |      |      |      |      |      |      |      |      |      |      |      |      |      |      |      |      |      |      |      |      |      |      |      |    |    |    |    |    |    |    |    |  |  |  |  |
| 5  | Corollospora maritima        | DB10 (KX261256)            | 0.01 | 0.01 | 0.00 |      |      |      |      |      |      |      |      |      |      |      |      |      |      |      |      |      |      |      |      |      |      |      |      |      |      |      |      |      |      |      |      |      |    |    |    |    |    |    |    |    |  |  |  |  |
| 6  | Corollospora maritima        | NBRC 32117 (JN943388)      | 0.01 | 0.01 | 0.00 | 0.00 |      |      |      |      |      |      |      |      |      |      |      |      |      |      |      |      |      |      |      |      |      |      |      |      |      |      |      |      |      |      |      |      |    |    |    |    |    |    |    |    |  |  |  |  |
| 7  | Corollospora sp.             | CMG 52 (MT235714)          | 0.05 | 0.04 | 0.04 | 0.04 | 0.04 |      |      |      |      |      |      |      |      |      |      |      |      |      |      |      |      |      |      |      |      |      |      |      |      |      |      |      |      |      |      |      |    |    |    |    |    |    |    |    |  |  |  |  |
| 8  | Corollospora mediterranea    | MUT 5040 (MW582549)        | 0.06 | 0.06 | 0.05 | 0.06 | 0.05 | 0.09 |      |      |      |      |      |      |      |      |      |      |      |      |      |      |      |      |      |      |      |      |      |      |      |      |      |      |      |      |      |      |    |    |    |    |    |    |    |    |  |  |  |  |
| 9  | Corollospora mediterranea    | MUT 5048 (MW582550)        | 0.06 | 0.06 | 0.05 | 0.06 | 0.05 | 0.09 | 0.00 |      |      |      |      |      |      |      |      |      |      |      |      |      |      |      |      |      |      |      |      |      |      |      |      |      |      |      |      |      |    |    |    |    |    |    |    |    |  |  |  |  |
| 10 | Corollosporopsis portsaidica | MUT 1941 (KU935658)        | 0.18 | 0.18 | 0.18 | 0.18 | 0.18 | 0.22 | 0.20 | 0.20 |      |      |      |      |      |      |      |      |      |      |      |      |      |      |      |      |      |      |      |      |      |      |      |      |      |      |      |      |    |    |    |    |    |    |    |    |  |  |  |  |
| 11 | Corollosporopsis portsaidica | IMI 395684 (NR175013)      | 0.18 | 0.18 | 0.17 | 0.17 | 0.17 | 0.21 | 0.19 | 0.19 | 0.02 |      |      |      |      |      |      |      |      |      |      |      |      |      |      |      |      |      |      |      |      |      |      |      |      |      |      |      |    |    |    |    |    |    |    |    |  |  |  |  |
| 12 | Corollosporopsis sp. 1       | ACA 10 (KX261227)          | 0.18 | 0.17 | 0.17 | 0.17 | 0.17 | 0.21 | 0.19 | 0.19 | 0.03 | 0.03 |      |      |      |      |      |      |      |      |      |      |      |      |      |      |      |      |      |      |      |      |      |      |      |      |      |      |    |    |    |    |    |    |    |    |  |  |  |  |
| 13 | Corollosporopsis sp. 1       | PV6 (KX261315)             | 0.18 | 0.17 | 0.17 | 0.17 | 0.17 | 0.21 | 0.19 | 0.19 | 0.03 | 0.03 | 0.00 |      |      |      |      |      |      |      |      |      |      |      |      |      |      |      |      |      |      |      |      |      |      |      |      |      |    |    |    |    |    |    |    |    |  |  |  |  |
| 14 | Corollosporopsis sp. 2       | CAN5 (KX261239)            | 0.17 | 0.17 | 0.16 | 0.16 | 0.16 | 0.20 | 0.18 | 0.18 | 0.08 | 0.08 | 0.08 | 0.08 |      |      |      |      |      |      |      |      |      |      |      |      |      |      |      |      |      |      |      |      |      |      |      |      |    |    |    |    |    |    |    |    |  |  |  |  |
| 15 | Corollosporopsis sp. 2       | CDC8 (KX261250)            | 0.17 | 0.17 | 0.17 | 0.17 | 0.16 | 0.21 | 0.18 | 0.18 | 0.08 | 0.08 | 0.08 | 0.08 | 0.00 |      |      |      |      |      |      |      |      |      |      |      |      |      |      |      |      |      |      |      |      |      |      |      |    |    |    |    |    |    |    |    |  |  |  |  |
| 16 | Corollosporopsis sp. 3       | NBRC 32118 (JN943387)      | 0.18 | 0.18 | 0.18 | 0.18 | 0.18 | 0.22 | 0.19 | 0.19 | 0.04 | 0.04 | 0.04 | 0.04 | 0.08 | 0.09 |      |      |      |      |      |      |      |      |      |      |      |      |      |      |      |      |      |      |      |      |      |      |    |    |    |    |    |    |    |    |  |  |  |  |
| 17 | Corollosporopsis sp. 3       | DUN7 (KX261267)            | 0.18 | 0.18 | 0.18 | 0.18 | 0.22 | 0.19 | 0.19 | 0.04 | 0.04 | 0.04 | 0.04 | 0.08 | 0.09 | 0.00 |      |      |      |      |      |      |      |      |      |      |      |      |      |      |      |      |      |      |      |      |      |      |    |    |    |    |    |    |    |    |  |  |  |  |
| 18 | Corollosporopsis sp. 4       | CUB9 (KX261255)            | 0.18 | 0.18 | 0.17 | 0.18 | 0.17 | 0.21 | 0.19 | 0.19 | 0.05 | 0.05 | 0.04 | 0.04 | 0.08 | 0.09 | 0.03 | 0.03 |      |      |      |      |      |      |      |      |      |      |      |      |      |      |      |      |      |      |      |      |    |    |    |    |    |    |    |    |  |  |  |  |
| 19 | Corollosporopsis sp. 5       | NBRC 106651                | 0.16 | 0.16 | 0.16 | 0.16 | 0.16 | 0.20 | 0.18 | 0.18 | 0.11 | 0.11 | 0.10 | 0.10 | 0.09 | 0.08 | 0.11 | 0.11 | 0.11 |      |      |      |      |      |      |      |      |      |      |      |      |      |      |      |      |      |      |      |    |    |    |    |    |    |    |    |  |  |  |  |
| 20 | pNGenus A sp.1               | HAW1 (KX261278)            | 0.16 | 0.15 | 0.14 | 0.15 | 0.15 | 0.19 | 0.17 | 0.17 | 0.15 | 0.14 | 0.14 | 0.14 | 0.14 | 0.14 | 0.15 | 0.15 | 0.15 | 0.13 |      |      |      |      |      |      |      |      |      |      |      |      |      |      |      |      |      |      |    |    |    |    |    |    |    |    |  |  |  |  |
| 21 | pNGenus A sp.1               | HAW2 (KX261279)            | 0.16 | 0.16 | 0.15 | 0.16 | 0.16 | 0.20 | 0.18 | 0.18 | 0.15 | 0.14 | 0.14 | 0.14 | 0.14 | 0.14 | 0.15 | 0.15 | 0.15 | 0.13 | 0.00 |      |      |      |      |      |      |      |      |      |      |      |      |      |      |      |      |      |    |    |    |    |    |    |    |    |  |  |  |  |
| 22 | pNGenus A sp. 2              | CUB4 (KX261253)            | 0.15 | 0.15 | 0.14 | 0.15 | 0.15 | 0.19 | 0.17 | 0.17 | 0.17 | 0.16 | 0.15 | 0.15 | 0.15 | 0.15 | 0.17 | 0.17 | 0.16 | 0.14 | 0.04 | 0.04 |      |      |      |      |      |      |      |      |      |      |      |      |      |      |      |      |    |    |    |    |    |    |    |    |  |  |  |  |
| 23 | pNGenus A sp. 2              | CUB7 (KX261254)            | 0.15 | 0.15 | 0.14 | 0.15 | 0.15 | 0.19 | 0.17 | 0.17 | 0.17 | 0.16 | 0.15 | 0.15 | 0.15 | 0.15 | 0.17 | 0.17 | 0.16 | 0.14 | 0.04 | 0.04 | 0.00 |      |      |      |      |      |      |      |      |      |      |      |      |      |      |      |    |    |    |    |    |    |    |    |  |  |  |  |
| 24 | Corollosporella ramulos      | a CBS:398.65 (MH858634)    | 0.17 | 0.17 | 0.16 | 0.16 | 0.16 | 0.20 | 0.17 | 0.17 | 0.19 | 0.18 | 0.17 | 0.17 | 0.18 | 0.18 | 0.19 | 0.19 | 0.18 | 0.16 | 0.17 | 0.17 | 0.17 | 0.17 |      |      |      |      |      |      |      |      |      |      |      |      |      |      |    |    |    |    |    |    |    |    |  |  |  |  |
| 25 | Corollosporella angulosa     | NBRC 104919                | 0.17 | 0.17 | 0.17 | 0.17 | 0.17 | 0.20 | 0.18 | 0.18 | 0.17 | 0.17 | 0.16 | 0.16 | 0.17 | 0.17 | 0.19 | 0.19 | 0.18 | 0.15 | 0.16 | 0.16 | 0.17 | 0.17 | 0.05 |      |      |      |      |      |      |      |      |      |      |      |      |      |    |    |    |    |    |    |    |    |  |  |  |  |
| 26 | Shirahamella gracilis        | 62 P1815996 001 (MT569588) | 0.15 | 0.15 | 0.14 | 0.15 | 0.14 | 0.18 | 0.15 | 0.15 | 0.15 | 0.15 | 0.14 | 0.14 | 0.14 | 0.14 | 0.16 | 0.16 | 0.16 | 0.15 | 0.15 | 0.16 | 0.16 | 0.16 | 0.12 | 0.12 |      |      |      |      |      |      |      |      |      |      |      |      |    |    |    |    |    |    |    |    |  |  |  |  |
| 27 | Shirahamella gracilis        | 14 A09 (MT569589)          | 0.15 | 0.15 | 0.14 | 0.15 | 0.14 | 0.18 | 0.15 | 0.15 | 0.15 | 0.15 | 0.14 | 0.14 | 0.14 | 0.14 | 0.16 | 0.16 | 0.16 | 0.15 | 0.15 | 0.16 | 0.16 | 0.16 | 0.12 | 0.12 | 0.00 |      |      |      |      |      |      |      |      |      |      |      |    |    |    |    |    |    |    |    |  |  |  |  |
| 28 | Shirahamella gracilis        | NBRC 32111 (JN943386)      | 0.16 | 0.16 | 0.15 | 0.15 | 0.15 | 0.19 | 0.16 | 0.16 | 0.16 | 0.16 | 0.14 | 0.14 | 0.14 | 0.15 | 0.14 | 0.16 | 0.16 | 0.15 | 0.15 | 0.15 | 0.16 | 0.16 | 0.12 | 0.12 | 0.03 | 0.03 |      |      |      |      |      |      |      |      |      |      |    |    |    |    |    |    |    |    |  |  |  |  |
| 29 | Shirahamella sp. 1           | MD 828 (AB361026)          | 0.16 | 0.16 | 0.16 | 0.16 | 0.15 | 0.19 | 0.16 | 0.16 | 0.17 | 0.17 | 0.16 | 0.16 | 0.17 | 0.17 | 0.18 | 0.18 | 0.17 | 0.16 | 0.16 | 0.16 | 0.17 | 0.17 | 0.12 | 0.12 | 0.05 | 0.05 | 0.04 |      |      |      |      |      |      |      |      |      |    |    |    |    |    |    |    |    |  |  |  |  |
| 30 | Aygaurospora pseudopulchella | NBRC 32112 (UDBO34332)     | 0.16 | 0.15 | 0.15 | 0.15 | 0.15 | 0.19 | 0.16 | 0.16 | 0.17 | 0.17 | 0.16 | 0.16 | 0.17 | 0.17 | 0.18 | 0.18 | 0.17 | 0.15 | 0.16 | 0.16 | 0.17 | 0.17 | 0.09 | 0.09 | 0.10 | 0.10 | 0.10 | 0.10 | 0.11 |      |      |      |      |      |      |      |    |    |    |    |    |    |    |    |  |  |  |  |
| 31 | Garethelia parvula           | NBRC 32159 (FJ591159)      | 0.16 | 0.15 | 0.14 | 0.15 | 0.15 | 0.19 | 0.16 | 0.16 | 0.18 | 0.17 | 0.17 | 0.17 | 0.16 | 0.16 | 0.18 | 0.18 | 0.17 | 0.16 | 0.15 | 0.15 | 0.16 | 0.16 | 0.11 | 0.10 | 0.12 | 0.12 | 0.12 | 0.12 | 0.13 | 0.08 |      |      |      |      |      |      |    |    |    |    |    |    |    |    |  |  |  |  |
| 32 | Garethelia parvula           | TUB6982 (EU557357)         | 0.16 | 0.16 | 0.14 | 0.15 | 0.15 | 0.19 | 0.16 | 0.16 | 0.18 | 0.17 | 0.17 | 0.17 | 0.16 | 0.16 | 0.18 | 0.18 | 0.17 | 0.16 | 0.16 | 0.16 | 0.16 | 0.16 | 0.11 | 0.10 | 0.12 | 0.12 | 0.12 | 0.12 | 0.13 | 0.08 | 0.00 |      |      |      |      |      |    |    |    |    |    |    |    |    |  |  |  |  |
| 33 | Paracorollospora angusta     | NBRC 32102 (JN943383)      | 0.19 | 0.18 | 0.18 | 0.18 | 0.18 | 0.22 | 0.20 | 0.20 | 0.20 | 0.20 | 0.21 | 0.21 | 0.19 | 0.19 | 0.21 | 0.21 | 0.20 | 0.21 | 0.19 | 0.20 | 0.21 | 0.21 | 0.19 | 0.17 | 0.17 | 0.17 | 0.18 | 0.19 | 0.18 | 0.16 | 0.17 |      |      |      |      |      |    |    |    |    |    |    |    |    |  |  |  |  |
| 34 | Paracorollospora angusta     | NBRC 32101 (JN943381)      | 0.19 | 0.18 | 0.18 | 0.18 | 0.18 | 0.22 | 0.20 | 0.20 | 0.20 | 0.20 | 0.21 | 0.21 | 0.19 | 0.19 | 0.21 | 0.21 | 0.20 | 0.21 | 0.19 | 0.20 | 0.21 | 0.21 | 0.19 | 0.17 | 0.17 | 0.17 | 0.18 | 0.19 | 0.18 | 0.16 | 0.17 | 0.00 |      |      |      |      |    |    |    |    |    |    |    |    |  |  |  |  |
| 35 | Paracorollospora marina      | NBRC 103271 (EU557359)     | 0.19 | 0.18 | 0.19 | 0.19 | 0.19 | 0.22 | 0.19 | 0.19 | 0.20 | 0.19 | 0.20 | 0.20 | 0.19 | 0.19 | 0.20 | 0.20 | 0.20 | 0.18 | 0.18 | 0.18 | 0.18 | 0.18 | 0.17 | 0.17 | 0.17 | 0.18 | 0.19 | 0.18 | 0.17 | 0.17 | 0.11 | 0.11 |      |      |      |      |    |    |    |    |    |    |    |    |  |  |  |  |
| 36 | Honshuriella fusca           | NBRC 32107 (JN943382)      | 0.22 | 0.22 | 0.22 | 0.22 | 0.22 | 0.25 | 0.23 | 0.23 | 0.20 | 0.20 | 0.19 | 0.19 | 0.19 | 0.19 | 0.21 | 0.21 | 0.20 | 0.17 | 0.19 | 0.19 | 0.20 | 0.20 | 0.22 | 0.21 | 0.18 | 0.18 | 0.18 | 0.19 | 0.19 | 0.20 | 0.20 | 0.21 | 0.21 | 0.21 |      |      |    |    |    |    |    |    |    |    |  |  |  |  |
| 37 | Honshuriella fusca           | NBRC 32108 (JN943385)      | 0.22 | 0.22 | 0.22 | 0.22 | 0.22 | 0.25 | 0.23 | 0.23 | 0.20 | 0.20 | 0.19 | 0.19 | 0.19 | 0.19 | 0.21 | 0.21 | 0.20 | 0.17 | 0.19 | 0.19 | 0.20 | 0.20 | 0.22 | 0.21 | 0.18 | 0.18 | 0.18 | 0.19 | 0.19 | 0.20 | 0.20 | 0.21 | 0.21 | 0.21 | 0.00 |      |    |    |    |    |    |    |    |    |  |  |  |  |
| 38 | Honshuriella sp.1            | NBRC 32109 (JN943384)      | 0.24 | 0.23 | 0.23 | 0.23 | 0.23 | 0.26 | 0.24 | 0.24 | 0.21 | 0.22 | 0.20 | 0.20 | 0.20 | 0.20 | 0.22 | 0.22 | 0.21 | 0.17 | 0.19 | 0.18 | 0.20 | 0.20 | 0.22 | 0.21 | 0.17 | 0.17 | 0.17 | 0.20 | 0.19 | 0.21 | 0.21 | 0.21 | 0.21 | 0.20 | 0.07 | 0.07 |    |    |    |    |    |    |    |    |  |  |  |  |
| 39 | Keraliethelia pulchella      | NBRC 31323                 | 0.25 | 0.24 | 0.24 | 0.24 | 0.24 | 0.27 | 0.26 | 0.26 | 0.24 | 0.23 | 0.23 | 0.23 | 0.23 | 0.23 | 0.24 | 0.24 | 0.24 | 0.23 | 0.21 | 0.21 | 0.23 | 0.23 | 0.21 | 0.20 | 0.22 | 0.22 | 0.21 | 0.22 |      |      |      |      |      |      |      |      |    |    |    |    |    |    |    |    |  |  |  |  |
