# Supplementary material for: Redefining the Genus Corollospora Based on Morphological and Phylogenetic Approaches
Source: MDPI journal article supplement (doi:10.3390/jof9080841), 2023-08-11
Supplement: s1 [file s1]

|    | 2                                                           | 3    | 4    | 5    | 6    | 7    | 8    | 9    | 10   | 11   | 12   | 13   | 14   | 15   | 16   | 17   | 18   | 19   | 20   | 21   | 22   | 23   | 24   | 25 |
|----|-------------------------------------------------------------|------|------|------|------|------|------|------|------|------|------|------|------|------|------|------|------|------|------|------|------|------|------|----|
| 2  | <hr/>                                                       |      |      |      |      |      |      |      |      |      |      |      |      |      |      |      |      |      |      |      |      |      |      |    |
| 2  | <i>C._maritima</i> _NBRC_32117_(JN941654)                   |      |      |      |      |      |      |      |      |      |      |      |      |      |      |      |      |      |      |      |      |      |      |    |
| 3  | <i>C._mediterranea</i> _MUT_5040_(MW584967)                 | 0.00 |      |      |      |      |      |      |      |      |      |      |      |      |      |      |      |      |      |      |      |      |      |    |
| 4  | <i>C._mediterranea</i> _MUT_5048_(MW584968)                 | 0.00 | 0.00 |      |      |      |      |      |      |      |      |      |      |      |      |      |      |      |      |      |      |      |      |    |
| 5  | <i>C._quinqueseptata</i> _NBRC_32115_(JN941647)             | 0.02 | 0.02 | 0.02 |      |      |      |      |      |      |      |      |      |      |      |      |      |      |      |      |      |      |      |    |
| 6  | <i>C._quinqueseptata</i> _NBRC_32114_(JN941648)             | 0.02 | 0.02 | 0.02 | 0.00 |      |      |      |      |      |      |      |      |      |      |      |      |      |      |      |      |      |      |    |
| 7  | <i>C._intermedia</i> _NBRC_104402                           | 0.01 | 0.01 | 0.01 | 0.01 | 0.01 |      |      |      |      |      |      |      |      |      |      |      |      |      |      |      |      |      |    |
| 8  | <i>Corollosporopsis</i> _sp._3_NBRC_32118_(JN941653)        | 0.03 | 0.03 | 0.03 | 0.03 | 0.03 | 0.02 |      |      |      |      |      |      |      |      |      |      |      |      |      |      |      |      |    |
| 9  | pNGenus_D_NBRC_32125_(JN941666)                             | 0.02 | 0.02 | 0.02 | 0.02 | 0.02 | 0.01 | 0.02 |      |      |      |      |      |      |      |      |      |      |      |      |      |      |      |    |
| 10 | pNGenus_D_NBRC_32126_(JN941665)                             | 0.02 | 0.02 | 0.02 | 0.02 | 0.02 | 0.01 | 0.02 | 0.00 |      |      |      |      |      |      |      |      |      |      |      |      |      |      |    |
| 11 | <i>Shirahamella</i> _gracilis_NBRC_32111_(JN941659)         | 0.01 | 0.02 | 0.02 | 0.01 | 0.01 | 0.01 | 0.02 | 0.01 | 0.01 |      |      |      |      |      |      |      |      |      |      |      |      |      |    |
| 12 | <i>Shirahamella</i> _gracilis_NBRC_32110_(JN941660)         | 0.01 | 0.02 | 0.02 | 0.01 | 0.01 | 0.01 | 0.02 | 0.01 | 0.01 | 0.00 |      |      |      |      |      |      |      |      |      |      |      |      |    |
| 13 | <i>Ajigaurospora</i> _pseudopulchella_NBRC_32113_(JN941651) | 0.02 | 0.02 | 0.02 | 0.02 | 0.02 | 0.01 | 0.02 | 0.00 | 0.00 | 0.01 | 0.01 |      |      |      |      |      |      |      |      |      |      |      |    |
| 14 | <i>Ajigaurospora</i> _pseudopulchella_NBRC_32112_(JN941652) | 0.02 | 0.02 | 0.02 | 0.02 | 0.02 | 0.01 | 0.02 | 0.00 | 0.00 | 0.01 | 0.01 | 0.00 |      |      |      |      |      |      |      |      |      |      |    |
| 15 | <i>Garethelia</i> _parvula_IFO32159_(DQ104806)              | 0.02 | 0.02 | 0.02 | 0.02 | 0.02 | 0.01 | 0.02 | 0.01 | 0.01 | 0.00 | 0.00 | 0.01 | 0.01 |      |      |      |      |      |      |      |      |      |    |
| 16 | <i>Paracorollospora</i> _angusta_NBRC_32101_(JN941668)      | 0.02 | 0.02 | 0.02 | 0.02 | 0.02 | 0.02 | 0.03 | 0.01 | 0.01 | 0.01 | 0.01 | 0.01 | 0.01 | 0.01 |      |      |      |      |      |      |      |      |    |
| 17 | <i>Paracorollospora</i> _angusta_NBRC_32102_(JN941667)      | 0.02 | 0.02 | 0.02 | 0.02 | 0.02 | 0.02 | 0.03 | 0.01 | 0.01 | 0.01 | 0.01 | 0.01 | 0.01 | 0.01 | 0.01 | 0.00 |      |      |      |      |      |      |    |
| 18 | <i>Paracorollospora</i> _luteola_NBRC_31316_(JN941655)      | 0.02 | 0.03 | 0.03 | 0.02 | 0.02 | 0.01 | 0.02 | 0.01 | 0.01 | 0.01 | 0.01 | 0.01 | 0.01 | 0.01 | 0.01 | 0.01 |      |      |      |      |      |      |    |
| 19 | <i>Paracorollospora</i> _luteola_NBRC_31315_(JN941656)      | 0.02 | 0.03 | 0.03 | 0.02 | 0.02 | 0.01 | 0.02 | 0.01 | 0.01 | 0.01 | 0.01 | 0.01 | 0.01 | 0.01 | 0.01 | 0.01 | 0.00 |      |      |      |      |      |    |
| 20 | <i>Keraliethelia</i> _pulchella_NBRC_32123_(JN941650)       | 0.03 | 0.03 | 0.03 | 0.03 | 0.03 | 0.02 | 0.03 | 0.02 | 0.02 | 0.02 | 0.02 | 0.02 | 0.02 | 0.02 | 0.02 | 0.02 | 0.02 |      |      |      |      |      |    |
| 21 | <i>Honshuriella</i> _fusca_NBRC_32107_(JN941662)            | 0.03 | 0.03 | 0.03 | 0.03 | 0.03 | 0.02 | 0.03 | 0.02 | 0.02 | 0.02 | 0.02 | 0.02 | 0.02 | 0.02 | 0.02 | 0.02 | 0.02 | 0.02 | 0.03 |      |      |      |    |
| 22 | pNGenus_B_NBRC_32105_(JN941663)                             | 0.03 | 0.03 | 0.03 | 0.02 | 0.02 | 0.02 | 0.03 | 0.01 | 0.01 | 0.02 | 0.02 | 0.01 | 0.01 | 0.02 | 0.02 | 0.02 | 0.02 | 0.02 | 0.02 | 0.03 |      |      |    |
| 23 | pNGenus_E_NBRC_32121_(JN941658)                             | 0.02 | 0.03 | 0.03 | 0.03 | 0.03 | 0.02 | 0.03 | 0.02 | 0.02 | 0.02 | 0.02 | 0.02 | 0.02 | 0.01 | 0.01 | 0.02 | 0.02 | 0.02 | 0.02 | 0.02 |      |      |    |
| 24 | pNGenus_E_NBRC_32122_(JN941657)                             | 0.02 | 0.03 | 0.03 | 0.03 | 0.03 | 0.02 | 0.03 | 0.02 | 0.02 | 0.02 | 0.02 | 0.02 | 0.02 | 0.01 | 0.01 | 0.02 | 0.02 | 0.02 | 0.02 | 0.02 | 0.02 | 0.00 |    |
| 25 | <i>Cucullosporella</i> _mangrovei_NT0U3744_(KX686771)       | 0.04 | 0.04 | 0.04 | 0.04 | 0.04 | 0.04 | 0.04 | 0.03 | 0.03 | 0.03 | 0.03 | 0.03 | 0.03 | 0.03 | 0.03 | 0.03 | 0.03 | 0.04 | 0.04 | 0.04 | 0.03 | 0.03 |    |

This analysis involved 24 nucleotide sequences of the 18S gene.

There were a total of 839 positions in the final dataset.

#### p-distance thresholds:

same species: 0%

same genus: 0–2%

between genera: ≥1%. Exceptions: 0% (*Shirahamella* and *Garethelia*; *Ajigaurospora* and pNGenus D)

to the outgroup: 3–4%

between the species of new genera and *C. maritima* : 1–3%
