# Supplementary material for: Redefining the Genus Corollospora Based on Morphological and Phylogenetic Approaches
Source: MDPI journal article supplement (doi:10.3390/jof9080841), 2023-08-11
Supplement: s1 [file s1]

Table S1

| Taxon (according to the present study) | Source                        | Registered Taxon              | Sequences retrieved from the databases |                       |                       | Sequence length  |      |          |
|----------------------------------------|-------------------------------|-------------------------------|----------------------------------------|-----------------------|-----------------------|------------------|------|----------|
|                                        |                               |                               | Access Number (Remarks)                |                       |                       | (N° nucleotides) |      |          |
|                                        |                               |                               | 18S gene                               | ITS region            | 28S gene              | 18S gene         | ITS  | 28S gene |
| <i>Keraliethelia pulchella</i>         | NBRC 8152                     | <i>Clavariopsis bulbosa</i>   | —                                      | —                     | NBRC 8152             | —                | —    | 569      |
| <i>Keraliethelia pulchella</i>         | * <u>NBRC 31323</u>           | <i>Clavariopsis bulbosa</i>   | —                                      | <u>NBRC 31323</u>     | <u>NBRC 31323</u>     | —                | 677  | 569      |
| <i>Keraliethelia pulchella</i>         | NBRC 31324                    | <i>Clavariopsis bulbosa</i>   | —                                      | —                     | NBRC 31324            | —                | —    | 580      |
| <i>Keraliethelia pulchella</i>         | NBRC 8152                     | <i>Corollospora pulchella</i> |                                        |                       | AB361021              | —                | —    | 1230     |
| <i>Keraliethelia pulchella</i>         | NBRC 32124                    | <i>Corollospora pulchella</i> | JN941649 (FBC) (d)                     | —                     | <u>JN941497</u> (FBC) | 1094             | —    | 897      |
| <i>Keraliethelia pulchella</i>         | <u>NBRC 32123</u>             | <i>Corollospora pulchella</i> | <u>JN941650</u> (FBC)                  | <u>JN943446</u> (FBC) | <u>JN941496</u> (FBC) | 1091             | 1289 | 897      |
| <i>Keraliethelia pulchella</i>         | <u>NTOU5721</u>               | <i>Corollospora pulchella</i> | —                                      | —                     | OQ130072              | —                | —    | 990      |
| <i>Keraliethelia pulchella</i>         | <u>NTOU5725</u>               | <i>Corollospora pulchella</i> | —                                      | —                     | OQ130070              | —                | —    | 991      |
| <i>Keraliethelia pulchella</i>         | <u>NTOU5727</u>               | <i>Corollospora pulchella</i> | —                                      | —                     | OQ130071              | —                | —    | 992      |
| <i>Keraliethelia</i> sp. 1             | <u>NTOU5730</u>               | <i>Corollospora pulchella</i> | —                                      | —                     | OQ130076              | —                | —    | 993      |
| <i>Keraliethelia</i> sp. 1             | <u>NTOU5732</u>               | <i>Corollospora pulchella</i> | —                                      | —                     | OQ130075              | —                | —    | 994      |
| <i>Keraliethelia</i> sp. 1             | <u>NTOU5738</u>               | <i>Corollospora pulchella</i> | —                                      | —                     | OQ130074              | —                | —    | 995      |
| <i>Keraliethelia</i> sp. 1             | <u>NTOU5741</u>               | <i>Corollospora pulchella</i> | —                                      | —                     | OQ130073              | —                | —    | 992      |
| Inconclusive placement (see notes)     | PP4294                        | <i>Corollospora pulchella</i> | —                                      | —                     | AF491261 (FBC) (d)    | —                | —    | 603      |
| Inconclusive placement (see notes)     | PP4206                        | <i>Corollospora pulchella</i> | —                                      | —                     | AF491274 (d)          | —                | —    | 721      |
| <i>Alternaria</i> sp. EXCLUDED         | MUT 399                       | <i>Corollospora angusta</i>   | —                                      | MK578241              | —                     | —                | 438  | —        |
| <i>Corollosporella angusta</i>         | MF 827                        | <i>Corollospora angusta</i>   | —                                      | AB361022 (c, d)       | AB361008              | —                | 598  | 1331     |
| <i>Corollosporella angusta</i>         | * <u>NBRC 104919</u> (MF 827) | <i>Corollospora angusta</i>   | —                                      | <u>NBRC 104919</u>    | <u>NBRC 104919</u>    | —                | 637  | 565      |
| <i>Paracorollospora angusta</i>        | KUC21260                      | <i>Corollospora angusta</i>   | —                                      | KT207778              | KT207728              | —                | 612  | 1080     |
| <i>Paracorollospora angusta</i>        | KUC21258                      | <i>Corollospora angusta</i>   | —                                      | KT207776              | KT207726              | —                | 614  | 789      |
| <i>Paracorollospora angusta</i>        | KUC21257                      | <i>Corollospora angusta</i>   | —                                      | KT207775              | KT207725              | —                | 612  | 989      |
| <i>Paracorollospora angusta</i>        | KUC21256                      | <i>Corollospora angusta</i>   | —                                      | KT207774              | KT207724              | —                | 612  | 989      |
| <i>Paracorollospora angusta</i>        | KUC21255                      | <i>Corollospora angusta</i>   | —                                      | KT207773              | KT207723              | —                | 612  | 864      |
| <i>Paracorollospora angusta</i>        | KUC21254                      | <i>Corollospora angusta</i>   | —                                      | KT207772              | KT207722              | —                | 596  | 1080     |
| <i>Paracorollospora angusta</i>        | KUC21252                      | <i>Corollospora angusta</i>   | —                                      | KT207770              | KT207720              | —                | 612  | 1080     |
| <i>Paracorollospora angusta</i>        | KUC21251                      | <i>Corollospora angusta</i>   | —                                      | KT207769              | KT207719              | —                | 612  | 1080     |
| <i>Paracorollospora angusta</i>        | KUC21250                      | <i>Corollospora angusta</i>   | —                                      | KT207768              | KT207718              | —                | 600  | 779      |
| <i>Paracorollospora angusta</i>        | KUC21249                      | <i>Corollospora angusta</i>   | —                                      | KT207767              | KT207717              | —                | 612  | 781      |

|                                                                         |                     |                                |                          |                          |                          |      |      |      |
|-------------------------------------------------------------------------|---------------------|--------------------------------|--------------------------|--------------------------|--------------------------|------|------|------|
| <i>Paracorlospora angusta</i>                                           | KUC21248            | <i>Corollospora angusta</i>    | —                        | KT207766                 | KT207716                 | —    | 612  | 1080 |
| <i>Paracorlospora angusta</i>                                           | KUC21247            | <i>Corollospora angusta</i>    | —                        | KT207765                 | KT207715                 | —    | 612  | 857  |
| <i>Paracorlospora angusta</i>                                           | KUC21246            | <i>Corollospora angusta</i>    | —                        | KT207764                 | KT207714                 | —    | 612  | —    |
| <i>Paracorlospora angusta</i>                                           | <u>NBRC 32102</u>   | <i>Corollospora angusta</i>    | <u>NBRC 32102</u>        | <u>JN943383</u><br>(FBC) | <u>JN941478</u><br>(FBC) | 1751 | 616  | 888  |
| <i>Paracorlospora angusta</i>                                           | * <u>NBRC 32101</u> | <i>Corollospora angusta</i>    | <u>NBRC 32101</u>        | <u>JN943381</u><br>(FBC) | <u>JN941477</u><br>(FBC) | 1751 | 1180 | 888  |
| <i>Paracorlospora angusta</i>                                           | NBRC 32100          | <i>Corollospora angusta</i>    | NBRC 32100<br>(FBC)      | JN943380<br>(FBC)        | JN941476<br>(FBC)        | 1751 | 616  | 888  |
| <i>Paracorlospora angusta</i>                                           | TUB1                | <i>Corollospora angusta</i>    | —                        | EU557360<br>(AFToL)      | —                        | —    | 683  | —    |
|                                                                         |                     |                                | —                        | —                        | AY305031                 | —    | —    | 526  |
| <i>Paracorlospora angusta</i>                                           | PP3903              | <i>Corollospora angusta</i>    | —                        | —                        | AF491254                 | —    | —    | 559  |
| Not subjected to the global<br>evaluation ( <a href="#">see notes</a> ) | AFTOL-ID 5010       | <i>Corollospora angusta</i>    | FJ176845<br>(AFToL) (d)  | —                        | FJ176900<br>(AFToL)      | 572  | —    | 1211 |
| pNGenus D; sp. 1 ( <a href="#">see notes</a> )                          | NBRC 32125          | <i>Corollospora</i>            | —                        | AB361023 (b,c)           | —                        | —    | 471  | —    |
| pNGenus D; sp. 1 ( <a href="#">see notes</a> )                          |                     | <i>cinnamomea</i>              | JN941665<br>(FBC)        | —                        | JN941479<br>(FBC)        | 1094 | —    | 893  |
| pNGenus D; sp. 1 ( <a href="#">see notes</a> )                          | NBRC 32126          | <i>Corollospora</i>            | JN941666<br>(FBC)        | —                        | JN941480<br>(FBC)        | 1094 | —    | 893  |
| pNGenus D; sp. 1 ( <a href="#">see notes</a> )                          | NTOU4949            | <i>Corollospora</i>            | —                        | —                        | OQ130064                 | —    | —    | 986  |
| pNGenus D; sp. 1 ( <a href="#">see notes</a> )                          | NTOU4950            | <i>Corollospora</i>            | —                        | —                        | OQ130065                 | —    | —    | 986  |
| <i>Tokurathelia colossa</i>                                             | *NBRC 32103         | <i>Corollospora colossa</i>    | JN941664<br>(FBC) (d)    | —                        | <u>JN941481</u><br>(FBC) | 1094 | —    | 933  |
| Not subjected to the global<br>evaluation ( <a href="#">see notes</a> ) | PP3904              | <i>Corollospora colossa</i>    | —                        | EU557366<br>(AFToL) (a)  | —                        | —    | 167  | —    |
|                                                                         |                     |                                | —                        | —                        | AF491255 (d)             | —    | —    | 623  |
| pNGenus B; sp. 1                                                        | <u>NBRC 32105</u>   | <i>Corollospora colossa</i>    | <u>JN941663</u><br>(FBC) | <u>JN943445</u><br>(FBC) | <u>JN941482</u><br>(FBC) | 1205 | 1083 | 904  |
| pNGenus C; sp. 1                                                        | <u>NBRC 106650</u>  | <i>Corollospora colossa</i>    | —                        | <u>NBRC 106650</u>       | <u>NBRC 106650</u>       | —    | 526  | 572  |
| <i>Nakagariella filiformis</i>                                          | * <u>NBRC 32106</u> | <i>Corollospora filiformis</i> | —                        | —                        | NBRC 32106               | —    | —    | 571  |
| <i>Nakagariella filiformis</i> ( <a href="#">see notes</a> )            | * <u>CBS 125146</u> | <i>Corollospora filiformis</i> | —                        | <u>MH863458</u>          | <u>MH874958</u>          | —    | 665  | 910  |
| <i>Nakagariella filiformis</i>                                          | PP3905              | <i>Corollospora filiformis</i> | —                        | —                        | AF491256                 | —    | —    | 539  |
| <i>Nakagariella filiformis</i>                                          | NTOU5709            | <i>Corollospora filiformis</i> | —                        | —                        | OQ130068                 | —    | —    | 993  |
| <i>Nakagariella filiformis</i>                                          | <u>NTOU5712</u>     | <i>Corollospora filiformis</i> | —                        | —                        | OQ130066                 | —    | —    | 993  |
| <i>Nakagariella filiformis</i>                                          | <u>NTOU5714</u>     | <i>Corollospora filiformis</i> | —                        | —                        | OQ130067                 | —    | —    | 993  |
| Not subjected to the global<br>evaluation ( <a href="#">see notes</a> ) | PP3906              | <i>Corollospora fusca</i>      | —                        | —                        | AF491257 (d)             | —    | —    | 602  |
| <i>Honshuriella fusca</i>                                               | <u>NBRC 32108</u>   | <i>Corollospora fusca</i>      | JN941661<br>(FBC) (d)    | <u>JN943385</u><br>(FBC) | <u>JN941484</u><br>(FBC) | 1094 | 1203 | 964  |
| <i>Honshuriella fusca</i>                                               | * <u>NBRC 32107</u> | <i>Corollospora fusca</i>      | <u>JN941662</u><br>(FBC) | <u>JN943382</u><br>(FBC) | <u>JN941483</u><br>(FBC) | 1548 | 605  | 964  |
| <i>Honshuriella</i> sp.                                                 | <u>NBRC 32109</u>   | <i>Corollospora fusca</i>      | —                        | <u>JN943384</u><br>(FBC) | <u>JN941485</u><br>(FBC) | —    | 602  | 897  |
| <i>Shirahamella gracilis</i>                                            | 23                  | <i>Corollospora gracilis</i>   | —                        | MT569575                 | —                        | —    | 546  | —    |

|                                                                  |                                    |                                     |                          |                          |                          |      |     |      |
|------------------------------------------------------------------|------------------------------------|-------------------------------------|--------------------------|--------------------------|--------------------------|------|-----|------|
| <i>Shirahamella gracilis</i>                                     | 9 E08                              | <i>Corollospora gracilis</i>        | —                        | MT569576                 | —                        | —    | 546 | —    |
| <i>Shirahamella gracilis</i>                                     | 62 P1815996 001                    | <u><i>Corollospora gracilis</i></u> | —                        | <u>MT569588</u>          | —                        | —    | 627 | —    |
| <i>Shirahamella gracilis</i>                                     | 14 A09                             | <u><i>Corollospora gracilis</i></u> | —                        | <u>MT569589</u>          | —                        | —    | 627 | —    |
| <i>Shirahamella gracilis</i>                                     | 5 D08                              | <i>Corollospora gracilis</i>        | —                        | MT569590                 | —                        | —    | 627 | —    |
| <i>Shirahamella gracilis</i>                                     | 30 E10                             | <i>Corollospora gracilis</i>        | —                        | MT569591                 | —                        | —    | 627 | —    |
| <i>Shirahamella gracilis</i>                                     | M3-1G F02                          | <i>Corollospora gracilis</i>        | —                        | MT569592                 | —                        | —    | 627 | —    |
| <i>Shirahamella gracilis</i>                                     | 11 G08                             | <i>Corollospora gracilis</i>        | —                        | MT569593                 | —                        | —    | 627 | —    |
| <i>Shirahamella gracilis</i>                                     | 112 P1815996 096                   | <i>Corollospora gracilis</i>        | —                        | MT569594                 | —                        | —    | 627 | —    |
| <i>Shirahamella gracilis</i>                                     | 111 P1815996 095                   | <i>Corollospora gracilis</i>        | —                        | MT569595                 | —                        | —    | 627 | —    |
| <i>Shirahamella gracilis</i>                                     | 1 A08                              | <i>Corollospora gracilis</i>        | —                        | MT569596                 | —                        | —    | 627 | —    |
| <i>Shirahamella gracilis</i>                                     | 4 C08                              | <i>Corollospora gracilis</i>        | —                        | MT569597                 | —                        | —    | 627 | —    |
| <i>Shirahamella gracilis</i>                                     | 26 A10                             | <i>Corollospora gracilis</i>        | —                        | MT569598                 | —                        | —    | 627 | —    |
| <i>Shirahamella gracilis</i>                                     | 10 F08                             | <i>Corollospora gracilis</i>        | —                        | MT569599                 | —                        | —    | 627 | —    |
| <i>Shirahamella gracilis</i>                                     | 28 C10                             | <i>Corollospora gracilis</i>        | —                        | MT569600                 | —                        | —    | 627 | —    |
| <i>Shirahamella gracilis</i>                                     | SFC102400                          | <i>Corollospora gracilis</i>        | —                        | MH374560                 | —                        | —    | 627 | —    |
| <i>Shirahamella gracilis</i>                                     | <u>NBRC 32111</u>                  | <i>Corollospora gracilis</i>        | <u>IN941659</u><br>(FBC) | <u>IN943386</u><br>(FBC) | <u>IN941487</u><br>(FBC) | 1750 | 625 | 892  |
| <i>Shirahamella gracilis</i>                                     | *NBRC 32110                        | <i>Corollospora gracilis</i>        | JN941660<br>(FBC)        | AB361025 (a)             | JN941486<br>(FBC)        | 1750 | 206 | 892  |
| <i>Shirahamella</i> sp. 1                                        | <u>MD 828</u>                      | <i>Corollospora gracilis</i>        | —                        | <u>AB361026</u>          | <u>AB361019</u>          | —    | 730 | 870  |
| Inconclusive placement (see Table 4)                             | PP3910                             | <i>Corollospora intermedia</i>      | —                        | —                        | AF491258 (b, d)          | —    | —   | 672  |
| Not subjected to the global evaluation (see notes)               | —                                  | <i>Corollospora intermedia</i>      | —                        | EU557363<br>(AFToL) (a)  | —                        | —    | 375 | —    |
| Controversial placement ( <i>Corollospora intermedia</i> ?) (see | <u>NBRC 104402</u>                 | <i>Corollospora intermedia</i>      | <u>NBRC 104402</u>       | <u>NBRC 104402</u>       | <u>NBRC 104402</u>       | 1751 | 652 | 565  |
| pNGenus E; sp. 1 (see notes)                                     | <u>NBRC 32121</u>                  | <i>Corollospora lacera</i>          | <u>IN941658</u><br>(FBC) | —                        | <u>IN941488</u><br>(FBC) | 1751 | —   | 889  |
| pNGenus E; sp. 1 (see notes)                                     | <u>NBRC 32122</u>                  | <i>Corollospora lacera</i>          | <u>IN941657</u><br>(FBC) | —                        | <u>IN941489</u><br>(FBC) | 1751 | —   | 889  |
| Inconclusive placement (see notes)                               | PP2509                             | <i>Corollospora lacera</i>          | —                        | —                        | AF491259                 | —    | —   | 742  |
| Not subjected to the global evaluation (see notes)               | LF813                              | <i>Corollospora lacera</i>          | KM096212                 | —                        | —                        | 1443 | —   | —    |
| <i>Paracorollospora luteola</i>                                  | <u>*NBRC 31315</u><br>(TKB-C-1250) | <i>Corollospora luteola</i>         | JN941656<br>(FBC)        | —                        | <u>IN941490</u><br>(FBC) | 1751 | —   | 891  |
| <i>Paracorollospora luteola</i>                                  | <u>NBRC 31316</u>                  | <i>Corollospora luteola</i>         | JN941491<br>(FBC)        | —                        | <u>IN941491</u><br>(FBC) | 1751 | —   | 891  |
| <i>Paracorollospora luteola</i>                                  | —                                  | <i>Corollospora luteola</i>         | DQ104805                 | —                        | DQ104809                 | 1058 | —   | 1210 |
| Inconclusive placement (see notes)                               | MD 825                             | <i>Corollospora maritima</i>        | —                        | AB361032 (b)             | AB361012                 | —    | 450 | 1222 |
| <i>Corollospora maritima</i>                                     | SON9                               | <i>Corollospora maritima</i>        | —                        | KX261321                 | —                        | —    | 518 | —    |
| <i>Corollospora maritima</i>                                     | SON7                               | <i>Corollospora maritima</i>        | —                        | KX261320                 | —                        | —    | 518 | —    |

|                              |         |                              |   |          |   |   |     |   |
|------------------------------|---------|------------------------------|---|----------|---|---|-----|---|
| <i>Corollospora maritima</i> | SON6    | <i>Corollospora maritima</i> | — | KX261319 | — | — | 519 | — |
| <i>Corollospora maritima</i> | SON5    | <i>Corollospora maritima</i> | — | KX261318 | — | — | 519 | — |
| <i>Corollospora maritima</i> | SON3    | <i>Corollospora maritima</i> | — | KX261317 | — | — | 519 | — |
| <i>Corollospora maritima</i> | SON2    | <i>Corollospora maritima</i> | — | KX261316 | — | — | 519 | — |
| <i>Corollospora maritima</i> | PRO9    | <i>Corollospora maritima</i> | — | KX261312 | — | — | 519 | — |
| <i>Corollospora maritima</i> | PRO8    | <i>Corollospora maritima</i> | — | KX261311 | — | — | 519 | — |
| <i>Corollospora maritima</i> | PRO7bis | <i>Corollospora maritima</i> | — | KX261310 | — | — | 520 | — |
| <i>Corollospora maritima</i> | PRO4    | <i>Corollospora maritima</i> | — | KX261309 | — | — | 520 | — |
| <i>Corollospora maritima</i> | PRO3    | <i>Corollospora maritima</i> | — | KX261308 | — | — | 520 | — |
| <i>Corollospora maritima</i> | MIR9    | <i>Corollospora maritima</i> | — | KX261298 | — | — | 519 | — |
| <i>Corollospora maritima</i> | MIR7    | <i>Corollospora maritima</i> | — | KX261297 | — | — | 519 | — |
| <i>Corollospora maritima</i> | MIR6    | <i>Corollospora maritima</i> | — | KX261296 | — | — | 519 | — |
| <i>Corollospora maritima</i> | MIR4    | <i>Corollospora maritima</i> | — | KX261295 | — | — | 519 | — |
| <i>Corollospora maritima</i> | MIR3    | <i>Corollospora maritima</i> | — | KX261294 | — | — | 519 | — |
| <i>Corollospora maritima</i> | MIR2    | <i>Corollospora maritima</i> | — | KX261293 | — | — | 519 | — |
| <i>Corollospora maritima</i> | MIR1    | <i>Corollospora maritima</i> | — | KX261292 | — | — | 519 | — |
| <i>Corollospora maritima</i> | LP8     | <i>Corollospora maritima</i> | — | KX261290 | — | — | 519 | — |
| <i>Corollospora maritima</i> | LP3     | <i>Corollospora maritima</i> | — | KX261289 | — | — | 519 | — |
| <i>Corollospora maritima</i> | LP2     | <i>Corollospora maritima</i> | — | KX261288 | — | — | 519 | — |
| <i>Corollospora maritima</i> | LP1     | <i>Corollospora maritima</i> | — | KX261287 | — | — | 519 | — |
| <i>Corollospora maritima</i> | DUN8    | <i>Corollospora maritima</i> | — | KX261268 | — | — | 519 | — |
| <i>Corollospora maritima</i> | DUN3    | <i>Corollospora maritima</i> | — | KX261266 | — | — | 519 | — |
| <i>Corollospora maritima</i> | DUN2    | <i>Corollospora maritima</i> | — | KX261265 | — | — | 519 | — |
| <i>Corollospora maritima</i> | DB9     | <i>Corollospora maritima</i> | — | KX261264 | — | — | 520 | — |
| <i>Corollospora maritima</i> | DB8     | <i>Corollospora maritima</i> | — | KX261263 | — | — | 520 | — |
| <i>Corollospora maritima</i> | DB7     | <i>Corollospora maritima</i> | — | KX261262 | — | — | 520 | — |
| <i>Corollospora maritima</i> | DB6     | <i>Corollospora maritima</i> | — | KX261260 | — | — | 518 | — |
| <i>Corollospora maritima</i> | DB4     | <i>Corollospora maritima</i> | — | KX261259 | — | — | 519 | — |
| <i>Corollospora maritima</i> | DB3     | <i>Corollospora maritima</i> | — | KX261258 | — | — | 519 | — |
| <i>Corollospora maritima</i> | DB1     | <i>Corollospora maritima</i> | — | KX261257 | — | — | 519 | — |
| <i>Corollospora maritima</i> | DB10    | <i>Corollospora maritima</i> | — | KX261256 | — | — | 520 | — |

|                              |                   |                              |                          |                          |                          |      |      |      |
|------------------------------|-------------------|------------------------------|--------------------------|--------------------------|--------------------------|------|------|------|
| <i>Corollospora maritima</i> | CUB10             | <i>Corollospora maritima</i> | —                        | KX261252                 | —                        | —    | 518  | —    |
| <i>Corollospora maritima</i> | CDC6              | <i>Corollospora maritima</i> | —                        | KX261249                 | —                        | —    | 519  | —    |
| <i>Corollospora maritima</i> | CDC5              | <i>Corollospora maritima</i> | —                        | KX261248                 | —                        | —    | 519  | —    |
| <i>Corollospora maritima</i> | CDC4              | <i>Corollospora maritima</i> | —                        | KX261247                 | —                        | —    | 519  | —    |
| <i>Corollospora maritima</i> | CDC3              | <i>Corollospora maritima</i> | —                        | KX261246                 | —                        | —    | 519  | —    |
| <i>Corollospora maritima</i> | CDC2              | <i>Corollospora maritima</i> | —                        | KX261245                 | —                        | —    | 519  | —    |
| <i>Corollospora maritima</i> | CDC1              | <i>Corollospora maritima</i> | —                        | KX261244                 | —                        | —    | 519  | —    |
| <i>Corollospora maritima</i> | CDC10             | <i>Corollospora maritima</i> | —                        | KX261243                 | —                        | —    | 519  | —    |
| <i>Corollospora maritima</i> | <u>NBRC 32117</u> | <i>Corollospora maritima</i> | <u>IN941654</u><br>(FBC) | <u>IN943388</u><br>(FBC) | <u>IN941492</u><br>(FBC) | 1091 | 1231 | 893  |
| <i>Corollospora maritima</i> | MD 835            | <i>Corollospora maritima</i> | —                        | AB361027                 | AB361009                 | —    | 700  | 864  |
| <i>Corollospora maritima</i> | <u>MD 831</u>     | <i>Corollospora maritima</i> | —                        | <u>AB361028</u>          | <u>AB361010</u>          | —    | 653  | 1314 |
| <i>Corollospora maritima</i> | MD 812            | <i>Corollospora maritima</i> | —                        | AB361029                 | AB361011                 | —    | 600  | 865  |
| <i>Corollospora maritima</i> | PAV-M 144         | <i>Corollospora maritima</i> | —                        | KF993401                 | —                        | —    | 645  | —    |
| <i>Corollospora maritima</i> | MUT 5102          | <i>Corollospora maritima</i> | —                        | MK581072                 | —                        | —    | 619  | —    |
| <i>Corollospora maritima</i> | SIC-023           | <i>Corollospora maritima</i> | —                        | MW218880                 | —                        | —    | 481  | —    |
| <i>Corollospora maritima</i> | NBRC 106640       | <i>Corollospora maritima</i> | —                        | NBRC 106640              | NBRC 106640              | —    | 632  | 565  |
| <i>Corollospora maritima</i> | NTOU4008          | <i>Corollospora maritima</i> | KX686769                 | —                        | KX686770                 | 1018 | —    | 989  |
| <i>Corollospora maritima</i> | AFTOL-ID 5011     | <i>Corollospora maritima</i> | FJ176846<br>(AFToL)      | —                        | FJ176901<br>(AFToL)      | 991  | —    | 865  |
| <i>Corollospora maritima</i> | 01092011III.3     | <i>Corollospora maritima</i> | —                        | KM272367                 | KM272359                 | —    | 598  | 882  |
| <i>Corollospora maritima</i> | 14                | <i>Corollospora maritima</i> | —                        | MT569527                 | —                        | —    | 626  | —    |
| <i>Corollospora maritima</i> | 3 P1815           | <i>Corollospora maritima</i> | —                        | MT569528                 | —                        | —    | 626  | —    |
| <i>Corollospora maritima</i> | 20 D05            | <i>Corollospora maritima</i> | —                        | MT569544                 | —                        | —    | 591  | —    |
| <i>Corollospora maritima</i> | 29                | <i>Corollospora maritima</i> | —                        | MT569545                 | —                        | —    | 578  | —    |
| <i>Corollospora maritima</i> | 11                | <i>Corollospora maritima</i> | —                        | MT569546                 | —                        | —    | 588  | —    |
| <i>Corollospora maritima</i> | 2                 | <i>Corollospora maritima</i> | —                        | MT569547                 | —                        | —    | 588  | —    |
| <i>Corollospora maritima</i> | 9                 | <i>Corollospora maritima</i> | —                        | MT569548                 | —                        | —    | 588  | —    |
| <i>Corollospora maritima</i> | 10                | <i>Corollospora maritima</i> | —                        | MT569549                 | —                        | —    | 588  | —    |
| <i>Corollospora maritima</i> | 12                | <i>Corollospora maritima</i> | —                        | MT569550                 | —                        | —    | 588  | —    |
| <i>Corollospora maritima</i> | 20                | <i>Corollospora maritima</i> | —                        | MT569551                 | —                        | —    | 588  | —    |
| <i>Corollospora maritima</i> | 6                 | <i>Corollospora maritima</i> | —                        | MT569552                 | —                        | —    | 588  | —    |
| <i>Corollospora maritima</i> | M10 4             | <i>Corollospora maritima</i> | —                        | MT569553                 | —                        | —    | 538  | —    |

|                                  |                  |                                  |          |                 |                 |      |     |      |
|----------------------------------|------------------|----------------------------------|----------|-----------------|-----------------|------|-----|------|
| <i>Corollospora maritima</i>     | 102              | <i>Corollospora maritima</i>     | —        | MT569560        | —               | —    | 628 | —    |
| <i>Corollospora maritima</i>     | 34               | <i>Corollospora maritima</i>     | —        | MT569561        | —               | —    | 628 | —    |
| <i>Corollospora maritima</i>     | 21               | <i>Corollospora maritima</i>     | —        | MT569562        | —               | —    | 628 | —    |
| <i>Corollospora maritima</i>     | 31               | <i>Corollospora maritima</i>     | —        | MT569563        | —               | —    | 628 | —    |
| <i>Corollospora maritima</i>     | 47               | <i>Corollospora maritima</i>     | —        | MT569564        | —               | —    | 628 | —    |
| <i>Corollospora maritima</i>     | 7                | <i>Corollospora maritima</i>     | —        | MT569565        | —               | —    | 628 | —    |
| <i>Corollospora maritima</i>     | 15               | <i>Corollospora maritima</i>     | —        | MT569566        | —               | —    | 628 | —    |
| <i>Corollospora maritima</i>     | 28               | <i>Corollospora maritima</i>     | —        | MT569567        | —               | —    | 628 | —    |
| <i>Corollospora maritima</i>     | 17               | <i>Corollospora maritima</i>     | —        | MT569568        | —               | —    | 628 | —    |
| <i>Corollospora maritima</i>     | M10 2            | <i>Corollospora maritima</i>     | —        | MT569569        | —               | —    | 628 | —    |
| <i>Corollospora maritima</i>     | 19               | <i>Corollospora maritima</i>     | —        | MT569570        | —               | —    | 590 | —    |
| <i>Corollospora maritima</i>     | 27               | <i>Corollospora maritima</i>     | —        | MT569571        | —               | —    | 590 | —    |
| <i>Corollospora maritima</i>     | 24               | <i>Corollospora maritima</i>     | —        | MT569572        | —               | —    | 620 | —    |
| <i>Corollospora maritima</i>     | 18 P1815996 073  | <i>Corollospora maritima</i>     | —        | MT569580        | —               | —    | 572 | —    |
| <i>Corollospora maritima</i>     | 1 P1815996 028   | <i>Corollospora maritima</i>     | —        | MT569581        | —               | —    | 572 | —    |
| <i>Corollospora maritima</i>     | 32 P1815996 072  | <i>Corollospora maritima</i>     | —        | MT569582        | —               | —    | 572 | —    |
| <i>Corollospora maritima</i>     | 16 P185996 057   | <i>Corollospora maritima</i>     | —        | MT569583        | —               | —    | 572 | —    |
| <i>Corollospora maritima</i>     | 123 P1815996 093 | <i>Corollospora maritima</i>     | —        | MT569584        | —               | —    | 555 | —    |
| <i>Corollospora maritima</i>     | 22 P1815996 007  | <i>Corollospora maritima</i>     | —        | MT569585        | —               | —    | 555 | —    |
| <i>Corollospora maritima</i>     | 23 P1815996 008  | <i>Corollospora maritima</i>     | —        | MT569586        | —               | —    | 587 | —    |
| <i>Corollospora maritima</i>     | MUT 1652         | <i>Corollospora maritima</i>     | MW543046 | MW543050        | MW543054        | 1018 | 587 | 1260 |
| <i>Corollospora maritima</i>     | MUT 1662         | <i>Corollospora maritima</i>     | MW543047 | MW543051        | MW543055        | 1042 | 526 | 1285 |
| <i>Corollospora maritima</i>     | MUT 1663         | <i>Corollospora maritima</i>     | —        | KF915979        | —               | —    | 567 | —    |
| <i>Corollospora maritima</i>     | MUT 3370         | <i>Corollospora maritima</i>     | —        | KF915985        | —               | —    | 550 | —    |
| <i>Corollospora maritima</i>     | MUT 3408         | <i>Corollospora maritima</i>     | MW543048 | MW543052        | MW543056        | 1025 | 621 | 1292 |
| <i>Corollospora maritima</i>     | MUT 3410         | <i>Corollospora maritima</i>     | MW543049 | MW543053        | MW543057        | 1019 | 623 | 1234 |
| <i>Corollospora maritima</i>     | SFC102442        | <i>Corollospora maritima</i>     | —        | MH374552        | —               | —    | 634 | —    |
| <i>Corollospora maritima</i>     | PP1991           | <i>Corollospora maritima</i>     | —        | —               | AF491260        | —    | —   | 859  |
| <i>Corollospora maritima</i>     | AW2871           | <i>Corollospora maritima</i>     | —        | MT802512        | —               | —    | 573 | —    |
| <i>Corollospora</i> sp. 1        | <u>CMG 52</u>    | <i>Corollospora maritima</i>     | —        | <u>MT235714</u> | <u>MT232383</u> | —    | 612 | 1229 |
| <i>Corollospora mediterranea</i> | MUT 1938         | <i>Corollospora mediterranea</i> | MW584966 | MW582548        | MW584957        | 1434 | 580 | 1429 |

|                                        |                        |                                  |                 |                    |                    |      |     |      |
|----------------------------------------|------------------------|----------------------------------|-----------------|--------------------|--------------------|------|-----|------|
| <i>Corollospora mediterranea</i>       | <u>MUT 5040</u>        | <i>Corollospora mediterranea</i> | <u>MW584967</u> | <u>MW582549</u>    | <u>MW584958</u>    | 1450 | 625 | 1421 |
| <i>Corollospora mediterranea</i>       | <u>MUT 5048</u>        | <i>Corollospora mediterranea</i> | <u>MW584968</u> | <u>MW582550</u>    | <u>MW584959</u>    | 1270 | 624 | 1351 |
| <i>Corollospora mediterranea</i>       | MUT 5049               | <i>Corollospora mediterranea</i> | MW584969        | MW582551           | MW584960           | 1086 | 628 | 943  |
| <i>Corollospora mediterranea</i>       | MUT 5082               | <i>Corollospora mediterranea</i> | —               | MW582552           | MW584961           | —    | 550 | 1030 |
| <i>Corollospora mediterranea</i>       | MUT 1587               | <i>Corollospora mediterranea</i> | MW584971        | KF915998           | MW584962           | 1321 | 628 | 1340 |
| <i>Corollospora mediterranea</i>       | *MUT 1950              | <i>Corollospora mediterranea</i> | NG_077446       | KU935664           | MW584963           | 1073 | 487 | 1137 |
| <i>Corollospora mediterranea</i>       | MUT 1954               | <i>Corollospora mediterranea</i> | MW584973        | KU935659 (a)       | MW584964           | 1391 | 418 | 1420 |
| <i>Corollospora mediterranea</i>       | MUT 1961               | <i>Corollospora mediterranea</i> | MW584974        | KU935662           | MW584965           | 1393 | 475 | 840  |
| pNGenus A; sp. 1                       | <u>CUB7</u>            | <i>Corollospora maritima</i>     | —               | <u>KX261254</u>    | —                  | —    | 448 | —    |
| pNGenus A; sp. 1                       | <u>CUB4</u>            | <i>Corollospora maritima</i>     | —               | <u>KX261253</u>    | —                  | —    | 448 | —    |
| pNGenus A; sp. 2                       | HAW9                   | <i>Corollospora maritima</i>     | —               | KX261286           | —                  | —    | 489 | —    |
| pNGenus A; sp. 2                       | HAW8                   | <i>Corollospora maritima</i>     | —               | KX261285           | —                  | —    | 489 | —    |
| pNGenus A; sp. 2                       | HAW7                   | <i>Corollospora maritima</i>     | —               | KX261284           | —                  | —    | 489 | —    |
| pNGenus A; sp. 2                       | HAW6                   | <i>Corollospora maritima</i>     | —               | KX261283           | —                  | —    | 489 | —    |
| pNGenus A; sp. 2                       | HAW5                   | <i>Corollospora maritima</i>     | —               | KX261282           | —                  | —    | 489 | —    |
| pNGenus A; sp. 2                       | HAW4                   | <i>Corollospora maritima</i>     | —               | KX261281           | —                  | —    | 489 | —    |
| pNGenus A; sp. 2                       | HAW3                   | <i>Corollospora maritima</i>     | —               | KX261280           | —                  | —    | 489 | —    |
| pNGenus A; sp. 2                       | <u>HAW2</u>            | <i>Corollospora maritima</i>     | —               | <u>KX261279</u>    | —                  | —    | 489 | —    |
| pNGenus A; sp. 2                       | <u>HAW1</u>            | <i>Corollospora maritima</i>     | —               | <u>KX261278</u>    | —                  | —    | 489 | —    |
| Not subjected to the global evaluation | JK 4834                | <i>Corollospora maritima</i>     | U46871          | —                  | U46884             | 1031 | —   | 878  |
| <i>Corollosporopsis</i> sp. 3          | CAN9                   | <i>Corollospora maritima</i>     | —               | KX261242           | —                  | —    | 500 | —    |
| <i>Corollosporopsis</i> sp. 3          | CAN8                   | <i>Corollospora maritima</i>     | —               | KX261241           | —                  | —    | 500 | —    |
| <i>Corollosporopsis</i> sp. 3          | CAN6                   | <i>Corollospora maritima</i>     | —               | KX261240           | —                  | —    | 500 | —    |
| <i>Corollosporopsis</i> sp. 3          | <u>CAN5</u>            | <i>Corollospora maritima</i>     | —               | <u>KX261239</u>    | —                  | —    | 500 | —    |
| <i>Corollosporopsis</i> sp. 3          | <u>CDC8</u>            | <i>Corollospora maritima</i>     | —               | <u>KX261250</u>    | —                  | —    | 496 | —    |
| <i>Corollosporopsis</i> sp. 5          | <u>NBRC 106651</u> (*) | <i>Corollospora maritima</i>     | —               | <u>NBRC 106651</u> | <u>NBRC 106651</u> | —    | 590 | 563  |
| <i>Corollosporopsis</i> sp. 2          | <u>ACA10</u>           | <i>Corollospora maritima</i>     | —               | <u>KX261227</u>    | —                  | —    | 506 | —    |
| <i>Corollosporopsis</i> sp. 2          | BR1                    | <i>Corollospora maritima</i>     | —               | KX261229           | —                  | —    | 506 | —    |
| <i>Corollosporopsis</i> sp. 2          | BR2                    | <i>Corollospora maritima</i>     | —               | KX261230           | —                  | —    | 505 | —    |
| <i>Corollosporopsis</i> sp. 2          | BR3                    | <i>Corollospora maritima</i>     | —               | KX261231           | —                  | —    | 505 | —    |
| <i>Corollosporopsis</i> sp. 2          | BR4                    | <i>Corollospora maritima</i>     | —               | KX261232           | —                  | —    | 505 | —    |

|                               |            |                              |   |                 |   |   |     |   |
|-------------------------------|------------|------------------------------|---|-----------------|---|---|-----|---|
| <i>Corollosporopsis</i> sp. 2 | BR5        | <i>Corollospora maritima</i> | — | KX261233        | — | — | 506 | — |
| <i>Corollosporopsis</i> sp. 2 | BR6        | <i>Corollospora maritima</i> | — | KX261234        | — | — | 507 | — |
| <i>Corollosporopsis</i> sp. 2 | BR7        | <i>Corollospora maritima</i> | — | KX261235        | — | — | 507 | — |
| <i>Corollosporopsis</i> sp. 2 | BR8        | <i>Corollospora maritima</i> | — | KX261236        | — | — | 505 | — |
| <i>Corollosporopsis</i> sp. 2 | BR9        | <i>Corollospora maritima</i> | — | KX261237        | — | — | 505 | — |
| <i>Corollosporopsis</i> sp. 2 | BR10       | <i>Corollospora maritima</i> | — | KX261228        | — | — | 505 | — |
| <i>Corollosporopsis</i> sp. 2 | TUX7       | <i>Corollospora maritima</i> | — | KX261334        | — | — | 505 | — |
| <i>Corollosporopsis</i> sp. 2 | TUX2       | <i>Corollospora maritima</i> | — | KX261331        | — | — | 505 | — |
| <i>Corollosporopsis</i> sp. 2 | TUX1       | <i>Corollospora maritima</i> | — | KX261330        | — | — | 495 | — |
| <i>Corollosporopsis</i> sp. 2 | TUX10      | <i>Corollospora maritima</i> | — | KX261329        | — | — | 505 | — |
| <i>Corollosporopsis</i> sp. 2 | TUX9       | <i>Corollospora maritima</i> | — | KX261336        | — | — | 505 | — |
| <i>Corollosporopsis</i> sp. 2 | TUX8       | <i>Corollospora maritima</i> | — | KX261335        | — | — | 505 | — |
| <i>Corollosporopsis</i> sp. 2 | TUX6       | <i>Corollospora maritima</i> | — | KX261333        | — | — | 505 | — |
| <i>Corollosporopsis</i> sp. 2 | TUX4       | <i>Corollospora maritima</i> | — | KX261332        | — | — | 505 | — |
| <i>Corollosporopsis</i> sp. 2 | TAB8       | <i>Corollospora maritima</i> | — | KX261328        | — | — | 505 | — |
| <i>Corollosporopsis</i> sp. 2 | TAB7       | <i>Corollospora maritima</i> | — | KX261327        | — | — | 505 | — |
| <i>Corollosporopsis</i> sp. 2 | TAB6       | <i>Corollospora maritima</i> | — | KX261326        | — | — | 495 | — |
| <i>Corollosporopsis</i> sp. 2 | TAB5       | <i>Corollospora maritima</i> | — | KX261325        | — | — | 505 | — |
| <i>Corollosporopsis</i> sp. 2 | TAB4       | <i>Corollospora maritima</i> | — | KX261324        | — | — | 505 | — |
| <i>Corollosporopsis</i> sp. 2 | TAB2       | <i>Corollospora maritima</i> | — | KX261323        | — | — | 505 | — |
| <i>Corollosporopsis</i> sp. 2 | TAB10      | <i>Corollospora maritima</i> | — | KX261322        | — | — | 506 | — |
| <i>Corollosporopsis</i> sp. 2 | <u>PV6</u> | <i>Corollospora maritima</i> | — | <u>KX261315</u> | — | — | 506 | — |
| <i>Corollosporopsis</i> sp. 2 | PV4        | <i>Corollospora maritima</i> | — | KX261314        | — | — | 506 | — |
| <i>Corollosporopsis</i> sp. 2 | PV3        | <i>Corollospora maritima</i> | — | KX261313        | — | — | 503 | — |
| <i>Corollosporopsis</i> sp. 2 | PAN3       | <i>Corollospora maritima</i> | — | KX261307        | — | — | 503 | — |
| <i>Corollosporopsis</i> sp. 2 | PAN2       | <i>Corollospora maritima</i> | — | KX261306        | — | — | 505 | — |
| <i>Corollosporopsis</i> sp. 2 | NAU8       | <i>Corollospora maritima</i> | — | KX261305        | — | — | 505 | — |
| <i>Corollosporopsis</i> sp. 2 | NAU7       | <i>Corollospora maritima</i> | — | KX261304        | — | — | 505 | — |
| <i>Corollosporopsis</i> sp. 2 | NAU5       | <i>Corollospora maritima</i> | — | KX261303        | — | — | 505 | — |
| <i>Corollosporopsis</i> sp. 2 | NAU4       | <i>Corollospora maritima</i> | — | KX261302        | — | — | 503 | — |
| <i>Corollosporopsis</i> sp. 2 | NAU3       | <i>Corollospora maritima</i> | — | KX261301        | — | — | 505 | — |

|                                                                      |                                      |                                     |                          |                          |                          |      |     |      |
|----------------------------------------------------------------------|--------------------------------------|-------------------------------------|--------------------------|--------------------------|--------------------------|------|-----|------|
| <i>Corollosporopsis</i> sp. 2                                        | NAU2                                 | <i>Corollospora maritima</i>        | —                        | KX261300                 | —                        | —    | 506 | —    |
| <i>Corollosporopsis</i> sp. 2                                        | NAU10                                | <i>Corollospora maritima</i>        | —                        | KX261299                 | —                        | —    | 507 | —    |
| <i>Corollosporopsis</i> sp. 2                                        | MIR10                                | <i>Corollospora maritima</i>        | —                        | KX261291                 | —                        | —    | 506 | —    |
| <i>Corollosporopsis</i> sp. 2                                        | ESC9                                 | <i>Corollospora maritima</i>        | —                        | KX261277                 | —                        | —    | 506 | —    |
| <i>Corollosporopsis</i> sp. 2                                        | ESC8                                 | <i>Corollospora maritima</i>        | —                        | KX261276                 | —                        | —    | 505 | —    |
| <i>Corollosporopsis</i> sp. 2                                        | ESC7                                 | <i>Corollospora maritima</i>        | —                        | KX261275                 | —                        | —    | 506 | —    |
| <i>Corollosporopsis</i> sp. 2                                        | ESC6                                 | <i>Corollospora maritima</i>        | —                        | KX261274                 | —                        | —    | 505 | —    |
| <i>Corollosporopsis</i> sp. 2                                        | ESC3                                 | <i>Corollospora maritima</i>        | —                        | KX261273                 | —                        | —    | 478 | —    |
| <i>Corollosporopsis</i> sp. 2                                        | ESC2                                 | <i>Corollospora maritima</i>        | —                        | KX261272                 | —                        | —    | 505 | —    |
| <i>Corollosporopsis</i> sp. 2                                        | EC4                                  | <i>Corollospora maritima</i>        | —                        | KX261271                 | —                        | —    | 503 | —    |
| <i>Corollosporopsis</i> sp. 2                                        | EC3                                  | <i>Corollospora maritima</i>        | —                        | KX261270                 | —                        | —    | 503 | —    |
| <i>Corollosporopsis</i> sp. 2                                        | EC1                                  | <i>Corollospora maritima</i>        | —                        | KX261269                 | —                        | —    | 503 | —    |
| <i>Corollosporopsis</i> sp. 2                                        | CDC9                                 | <i>Corollospora maritima</i>        | —                        | KX261251                 | —                        | —    | 505 | —    |
| <i>Corollosporopsis</i> sp. 2                                        | CAN10                                | <i>Corollospora maritima</i>        | —                        | <u>KX261238</u>          | —                        | —    | 492 | —    |
| <i>Corollosporopsis</i> sp. 1                                        | <u>NBRC 32118 (*)</u>                | <i>Corollospora maritima</i>        | <u>IN941653</u><br>(FBC) | <u>IN943387</u><br>(FBC) | <u>IN941493</u><br>(FBC) | 1094 | 611 | 956  |
| <i>Corollosporopsis</i> sp. 1                                        | <u>DUN7</u>                          | <i>Corollospora maritima</i>        | —                        | <u>KX261267</u>          | —                        | —    | 500 | —    |
| <i>Corollosporopsis</i> sp. 4                                        | <u>CUB9</u>                          | <i>Corollospora maritima</i>        | —                        | <u>KX261255</u>          | —                        | —    | 492 | —    |
| <i>Corollosporopsis portsaidica</i>                                  | MD 1301                              | <i>Corollospora portsaidica</i>     | —                        |                          | KJ406564                 | —    | —   | 1377 |
| <i>Corollosporopsis portsaidica</i>                                  | MUT 1941                             | <i>Corollospora portsaidica</i>     | —                        | <u>KU935658</u>          | —                        | —    | 520 | —    |
|                                                                      |                                      |                                     | —                        | NR_175013                | NG_078629                | —    | 699 | 1369 |
| <i>Corollosporopsis portsaidica</i>                                  | <u>*MF 832 (IMI 395684 / MD 832)</u> | <i>Corollospora portsaidica</i>     |                          | AB361031                 | AB361016                 |      |     | 1369 |
|                                                                      |                                      |                                     | —                        | NBRC 105265              | NBRC 105265              | —    | 699 | 1369 |
| <i>Ajigaurospora pseudopulchella</i>                                 | <u>NBRC 32113</u>                    | <i>Corollospora pseudopulchella</i> | <u>IN941651</u><br>(FBC) | —                        | <u>IN941495</u><br>(FBC) | 1094 | —   | 947  |
| <i>Ajigaurospora pseudopulchella</i>                                 | <u>*NBRC 32112</u>                   | <i>Corollospora pseudopulchella</i> | <u>IN941652</u><br>(FBC) | UDBO34332<br>(UNITE)     | <u>IN941494</u><br>(FBC) | 1094 | —   | 947  |
| pNGenus F; sp. 1                                                     | NBRC 106641                          | <i>Corollospora pseudopulchella</i> | —                        | —                        | <u>NBRC 106641</u>       | —    | —   | 562  |
| pNGenus F; sp. 1                                                     | NBRC 106642                          | <i>Corollospora pseudopulchella</i> | —                        | —                        | <u>NBRC 106642</u>       | —    | —   | 562  |
| <i>Corollospora quinquesepata</i>                                    | <u>*NBRC 32115</u>                   | <i>Corollospora quinquesepata</i>   | <u>IN941647</u><br>(FBC) | —                        | <u>IN941499</u><br>(FBC) | 1751 | —   | 891  |
| <i>Corollospora quinquesepata</i>                                    | <u>NBRC 32114</u>                    | <i>Corollospora quinquesepata</i>   | <u>IN941648</u><br>(FBC) | —                        | <u>IN941498</u><br>(FBC) | 1108 | —   | 891  |
| pNGenus G; sp. 1                                                     | PP3909                               | <i>Corollospora quinquesepata</i>   | —                        | —                        | <u>AF491262</u>          | —    | —   | 664  |
| Not subjected to the global evaluation ( <a href="#">see notes</a> ) | LF747                                | <i>Corollospora quinquesepata</i>   | KM096200                 | —                        | —                        | 1488 | —   | —    |
| Not subjected to the global evaluation ( <a href="#">see notes</a> ) | TUB557                               | <i>Sigmoidea luteola</i>            | —                        | EU557358<br>(FBC) (a)    | —                        | —    | 381 | —    |

|                                                                       |                          |                                          |                     |                     |                     |      |      |      |
|-----------------------------------------------------------------------|--------------------------|------------------------------------------|---------------------|---------------------|---------------------|------|------|------|
| <i>Paracorollospora marina</i>                                        | TUB2                     | <i>Sigmoidea marina</i>                  | —                   | —                   | AY305032            | —    | —    | 530  |
| <i>Paracorollospora marina</i>                                        | *NBRC 103271             | <i>Sigmoidea marina</i>                  | —                   | EU557359<br>(AFToL) | —                   | —    | 635  | —    |
| <i>Paracorollospora marina</i>                                        |                          |                                          | —                   | —                   | NBRC 103271         | —    | —    | 562  |
| <i>Paracorollospora marina</i>                                        | AFTOL-ID 5008            | <i>Sigmoidea marina</i>                  | FI176843<br>(AFToL) | —                   | FI176898<br>(AFToL) | 1261 | —    | 784  |
| <i>Paracorollospora marina</i>                                        | —                        | <i>Sigmoidea marina</i>                  | —                   | —                   | DQ104811            | —    | —    | 1208 |
| <i>Garethelia parvula</i>                                             | NBRC 666                 | <i>Sigmoidea parvula</i>                 | —                   | FJ591161            | —                   | —    | 658  | —    |
| <i>Garethelia parvula</i>                                             | NBRC 32160               | <i>Sigmoidea parvula</i>                 | —                   | FJ591160            | NBRC 32160          | —    | 658  | 1219 |
| <i>Garethelia parvula</i>                                             | NBRC 32159 /<br>IFO32159 | <i>Sigmoidea parvula</i>                 | —                   | FI591159 (e)        | —                   | —    | 658  | —    |
| <i>Garethelia parvula</i>                                             |                          |                                          | DQ104806 (e)        | —                   | DQ104810 (e)        | 1216 | —    | 563  |
| <i>Garethelia parvula</i>                                             | TUB6982                  | <i>Sigmoidea parvula</i>                 | —                   | EU557357<br>(AFToL) | —                   | —    | 518  | —    |
| <i>Garethelia parvula</i>                                             | TUB6989                  | <i>Sigmoidea parvula</i>                 | —                   | EU557356<br>(AFToL) | —                   | —    | 415  | —    |
| <i>Garethelia parvula</i>                                             | *CBS 116644              | <i>Sigmoidea parvula</i>                 | —                   | MH863000            | MH874556            | —    | 674  | 899  |
| <i>Garethelia parvula</i>                                             | NBRC 103558              | <i>Sigmoidea parvula</i>                 | —                   | —                   | NBRC 103558         | —    | —    | 563  |
| <i>Garethelia parvula</i>                                             | NBRC 106655              | <i>Sigmoidea parvula</i>                 | —                   | —                   | NBRC 106655         | —    | —    | 563  |
| <i>Garethelia parvula</i>                                             | NBRC 106659              | <i>Sigmoidea parvula</i>                 | —                   | —                   | NBRC 106659         | —    | —    | 563  |
| <i>Garethelia parvula</i>                                             | NBRC 106660              | <i>Sigmoidea parvula</i>                 | —                   | —                   | NBRC 106660         | —    | —    | 563  |
| Controversial placement<br>( <i>Corollosporella prolifera</i> ?) (see | NBRC 32120               | <i>Varicosporina prolifera</i>           | NBRC 32120          | NBRC 32120          | NBRC 32120          | 1751 | 672  | 565  |
| <i>Corollosporella ramulosa</i>                                       | *CBS 398.65              | <i>Varicosporina ramulosa</i>            | —                   | MH858634            | MH870274            | —    | 614  | 896  |
| <i>Corollosporella ramulosa</i>                                       | PP1232                   | <i>Varicosporina ramulosa</i>            | —                   | —                   | AF491276            | —    | —    | 867  |
| <i>Corollosporella ramulosa</i>                                       | RVG-113                  | <i>Varicosporina ramulosa</i>            | U43846              | —                   | U44092              | 1000 | —    | 878  |
| <i>Corollosporella ramulosa</i>                                       | NBRC 32163               | <i>Varicosporina ramulosa</i>            | —                   | —                   | NBRC32163           | —    | —    | 563  |
| <i>Corollosporella ramulosa</i> (see<br>notes)                        | *NBRC 31325              | <i>Varicosporina ramulosa</i>            | —                   | AB361033 (d)        | AB361020            | —    | 571  | 1298 |
| <i>Cucullosporella mangrovei</i>                                      | NBRC 32477               | <i>Cucullosporella mangrovei</i>         | —                   | NBRC 32477          | NBRC 32477          | —    | 1329 | 1329 |
| <i>Cucullosporella mangrovei</i>                                      | NBRC 105272              | <i>Cucullosporella mangrovei</i>         | —                   | NBRC 105272         | NBRC 105272         | —    | 785  | 562  |
| <i>Cucullosporella mangrovei</i>                                      | NTOU3744                 | <i>Cucullosporella mangrovei</i>         | KX686771            | —                   | KX686772            | 964  | —    | 963  |
| <i>Trailia ascophylli</i>                                             | NBRC 106638              | <i>Trailia ascophylli</i>                | —                   | NBRC 106638         | NBRC 106638         | —    | 597  | 566  |
| <i>Trailia ascophylli</i>                                             | NBRC 106637              | <i>Trailia ascophylli</i>                | —                   | NBRC 106637         | NBRC 106637         | —    | 598  | 566  |
| <i>Ascosacculus fusiformis</i>                                        | MELUCC 14-0036           | <i>Ascosacculus fusiformis</i>           | NG_070127           | MK878373            | NG_070127           | —    | —    | —    |
|                                                                       | MELU 15-0068             | <i>Ascosacculus fusiformis</i>           | —                   | NR_168817           | —                   | —    | —    | —    |
| <i>Ascosacculus heteroguttulatus</i>                                  | A108-7D                  | <i>Ascosacculus heteroguttulatus</i>     | AF352085            | —                   | AF352085            | —    | —    | —    |
| <i>Carbosphaerella</i>                                                | NBRC 106647              | <i>Carbosphaerella leptosphaerioides</i> | NBRC106647          | NBRC106647          | —                   | —    | —    | —    |

|                                                                          |                     |                                          |            |            |            |      |      |      |
|--------------------------------------------------------------------------|---------------------|------------------------------------------|------------|------------|------------|------|------|------|
| <i>leptosphaerioides</i>                                                 | <u>NBRC 106648</u>  | <i>Carbosphaerella leptosphaerioides</i> | NBRC106648 | NBRC106648 | —          |      |      | —    |
| <i>Cucurbitinus constrictus</i>                                          | <u>CGMCC3.19606</u> | <i>Cucurbitinus constrictus</i>          | MN431419   | MN431306   | MN437320   | 822  | 629  | 1438 |
|                                                                          | <u>CGMCC3.19640</u> | <i>Cucurbitinus constrictus</i>          | MN431420   | MN431307   | MN437321   | 801  | 613  | 1026 |
| <i>Halosphaeriopsis mediosetigera</i> / <i>Trichocladium achrasporum</i> | <u>NBRC 32127</u>   | <i>Halosphaeriopsis mediosetigera</i>    | NBRC32127  | NBRC32127  | NBRC32127  | 547  | 593  | 1751 |
|                                                                          | <u>NBRC 32128</u>   | <i>Halosphaeriopsis mediosetigera</i>    | NBRC32128  | NBRC32128  | NBRC32128  | 559  | 594  | 1751 |
|                                                                          | <u>NBRC 32161</u>   | <i>Trichocladium achrasporum</i>         | NBRC32161  | NBRC32161  | NBRC32161  | 1195 | 1195 | —    |
|                                                                          | <u>NBRC 105258</u>  | <i>Trichocladium achrasporum</i>         | NBRC105258 | NBRC105258 | NBRC105258 | 559  | 586  | —    |
| <i>Oceanitis scuticella</i>                                              | <u>M0229768</u>     | <i>Oceanitis scuticella</i>              | KU712509   | KU712506   | —          | 992  | 436  | —    |
|                                                                          | <u>CP2421</u>       | <i>Oceanitis scuticella</i>              | EU118367   | KU712507   | —          | 993  | 437  | —    |
|                                                                          | <u>CP2429</u>       | <i>Oceanitis scuticella</i>              | EU118366   | KU712508   | —          | 987  | 436  | —    |
| <i>Phaeonectriella lignicola</i>                                         | <u>PP7008</u>       | <i>Phaeonectriella lignicola</i>         | AY150224   | AY150224   | —          | 1774 | 1774 | —    |
| <i>Tinhaudeus formosanus</i>                                             | <u>NTOU3805</u>     | <i>Tinhaudeus formosanus</i>             | KT159899   | KT159895   | KT159897   | 961  | 599  | 964  |
| <i>Microascus longirostris</i>                                           | <u>CBS 415.64</u>   | <i>Microascus longirostris</i>           | LM652516   | LM652422   | —          | 584  | 533  | —    |
|                                                                          | <u>*CBS 196.61</u>  | <i>Microascus longirostris</i>           | NG_058479  | NR_132945  | —          | 784  | 540  | —    |
| <i>Microascus cirrosus</i>                                               | <u>*CBS 217.31</u>  | <i>Microascus cirrosus</i>               | MH866642   | MH855194   | —          | 899  | 590  | —    |
| <i>Petriella sordida</i>                                                 | <u>CBS 144612</u>   | <i>Petriella sordida</i>                 | MK442544   | MK442608   | —          | 794  | 565  | —    |
|                                                                          | <u>CBS 145121</u>   | <i>Petriella sordida</i>                 | MK442545   | MK442609   | —          | 791  | 576  | —    |
| <i>Xylaria hypoxylon</i>                                                 | <u>ATCC 42768</u>   | <i>Xylaria hypoxylon</i>                 | AY327480   | AY327477   | —          | 573  | 963  | —    |
|                                                                          | <u>AFTOL-ID 51</u>  | <i>Xylaria hypoxylon</i>                 | AY544648   | DQ491487   | —          | 1373 | 573  | —    |
